# Supplementary material
Source: publisher figshare collection journal article supplement (https://acs.figshare.com/ndownloader/files/18660638)

## Supporting Information

*Neisseria gonorrhoeae* becomes susceptible to polymyxin B and colistin in the presence of PBT2.

Freda E.-C. Jen<sup>1</sup>, Arun V. Everest-Dass<sup>1</sup>, Ibrahim M. El-Deeb<sup>1</sup>, Sanjesh Singh<sup>1</sup>, Thomas Haselhorst<sup>1</sup>, Mark J. Walker<sup>2</sup>, Mark von Itzstein<sup>1</sup>, Michael P. Jennings<sup>1</sup>

<sup>1</sup> Institute for Glycomics, Griffith University, Gold Coast Campus, Southport QLD 4222, Australia

<sup>2</sup> School of Chemistry and Molecular Biosciences and Australian Infectious Diseases Research Centre, The University of Queensland, Brisbane, QLD, Australia

Corresponding author:

Michael P. Jennings [m.jennings@griffith.edu.au](mailto:m.jennings@griffith.edu.au)

Table S1. A study to establish the sub-inhibitory concentrations of PBT2/zinc so that the potential for PBT2/zinc to synergize with other antibiotics could be tested.

|                        | PBT2 (μM) |      |      |      |     |      |          |   |   |   |   |    |
|------------------------|-----------|------|------|------|-----|------|----------|---|---|---|---|----|
|                        | 0         | 0.01 | 0.02 | 0.05 | 0.1 | 0.25 | 0.5      | 1 | 2 | 4 | 8 | 16 |
| ZnSO <sub>4</sub> (μM) | 0         |      |      |      |     |      |          |   |   |   |   |    |
|                        | 1.25      |      |      |      |     |      |          |   |   |   |   |    |
|                        | 2.5       |      |      |      |     |      | selected |   |   |   |   |    |
|                        | 5         |      |      |      |     |      |          |   |   |   |   |    |
|                        | 10        |      |      |      |     |      |          |   |   |   |   |    |
|                        | 20        |      |      |      |     |      |          |   |   |   |   |    |
|                        | 40        |      |      |      |     |      |          |   |   |   |   |    |

“Selected” indicates the concentration of PBT2/zinc (PBT2 (0.5 μM)/zinc (2.5 μM)) that was 4-fold less than the MIC of PBT2 or PBT2/zinc. MIC of ZnSO<sub>4</sub> was not determined.

Table S2. MICs of synergistic antimicrobial activity of PBT2/zinc and cefixime, ceftriaxone, azithromycin and ciprofloxacin with WHO Z strain.

| Antibiotics (mg/L)   | BT2: 0 μM<br>Zinc: 0 μM | PBT2: 1 μM<br>Zinc: 5 μM | PBT2: 1 μM | Zinc: 5 μM |
|----------------------|-------------------------|--------------------------|------------|------------|
| <b>Cefixime</b>      | 2 (R)                   | 1 (R)                    | 2 (R)      | 1 (R)      |
| <b>Ceftriaxone</b>   | 2 (R)                   | 1 (R)                    | 2 (R)      | 1 (R)      |
| <b>Azithromycin</b>  | 1 (R)                   | 1 (R)                    | 1 (R)      | 1 (R)      |
| <b>Ciprofloxacin</b> | >50 (R)                 | 50 (R)                   | 50 (R)     | 50 (R)     |
| <b>Kanamycin</b>     | 8 (S)                   | 4 (S)                    |            |            |
| <b>Gentamicin</b>    | 8 (S)                   | 2 (S)                    |            |            |

Table S3. The relative abundance of the lipid A ions observed in MALDI. The PE reduced in the lipid A purified from WT growing in PBT2/zinc is  $49.52 \pm 1.97\%$  (statistical significance between WT treated vs untreated PBT2/zinc was calculated using student T-test,  $P=0.0094$ ).

| Sample                 | Mass     | Molecule           | Abund. | Abd.[%] | Std.Dev. | Reduction[%]     |
|------------------------|----------|--------------------|--------|---------|----------|------------------|
| <b>WT</b>              |          |                    |        |         |          |                  |
| A                      | 1696.029 | [M-H] <sup>-</sup> | 57021  | 100     | 0.085    |                  |
| B                      | 1616.071 | [M-H] <sup>-</sup> | 19087  | 33.47   | 0.319    |                  |
| C                      | 1739.072 | [M-H] <sup>-</sup> | 52291  | 91.7    | 0.067    |                  |
| D                      | 1819.056 | [M-H] <sup>-</sup> | 47390  | 83.11   | 0.063    |                  |
| <b>LptA</b>            |          |                    |        |         |          |                  |
| A                      | 1696.053 | [M-H] <sup>-</sup> | 286881 | 100     | 0.035    |                  |
| B                      | 1616.099 | [M-H] <sup>-</sup> | 88041  | 30.69   | 0.043    |                  |
| C                      |          |                    |        | 0       |          |                  |
| D                      |          |                    |        | 0       |          |                  |
| <b>WT in PBT2/zinc</b> |          |                    |        |         |          |                  |
| A                      | 1695.999 | [M-H] <sup>-</sup> | 279496 | 100     | 0.067    |                  |
| B                      | 1616.043 | [M-H] <sup>-</sup> | 74109  | 26.52   | 0.037    |                  |
| C                      | 1739.043 | [M-H] <sup>-</sup> | 121859 | 43.6    | 0.039    | $47.55 \pm 1.97$ |
| D                      | 1819.026 | [M-H] <sup>-</sup> | 119596 | 42.79   | 0.088    | $51.49 \pm 1.97$ |

Table S4. The integrals of the HSQC signals of phosphoethanoline of lipid A observed in NMR to quantitate the impact of the LptA mutation and treatment with PBT2/zinc on *N. gonorrhoeae* WHO Z. The PE reduced in the lipid A purified from WT growing in PBT2/zinc is  $46.43 \pm 4.08\%$  (statistical significance between WT treated vs untreated PBT2/zinc was calculated using student T-test,  $P=0.0139$ ).

| Sample               | Integral[ref] | F2[ppm] | F1[ppm] | Reduction[%]     |
|----------------------|---------------|---------|---------|------------------|
| <b>WT</b>            |               |         |         |                  |
| ref.                 | 1             | 3.3     | 48.1    |                  |
| C1                   | 0.0695        | 3.2     | 39.8    |                  |
| C2                   | 0.0789        | 4.2     | 62.2    |                  |
| <b>LptA</b>          |               |         |         |                  |
| ref.                 | 1             | 3.3     | 48.52   |                  |
| C1                   | -             | -       | -       |                  |
| C2                   | -             | -       | -       |                  |
| <b>WT in PBT2/Zn</b> |               |         |         |                  |
| ref.                 | 1             | 3.3     | 48.5    |                  |
| C1                   | 0.0350        | 3.2     | 39.9    | $42.35 \pm 4.08$ |
| C2                   | 0.0338        | 4.2     | 61.8    | $50.50 \pm 4.08$ |

Figure S1. Time-kill curves of *N. gonorrhoeae* WHO Z in GC broth with or without PBT2/zinc (PBT2 (0.5  $\mu$ M)/zinc (2.5  $\mu$ M)), in the absence and presence of colistin (1.56 mg/L) or polymyxin B (0.98 mg/L). Error bars indicate standard deviation from 3 biological replicates.

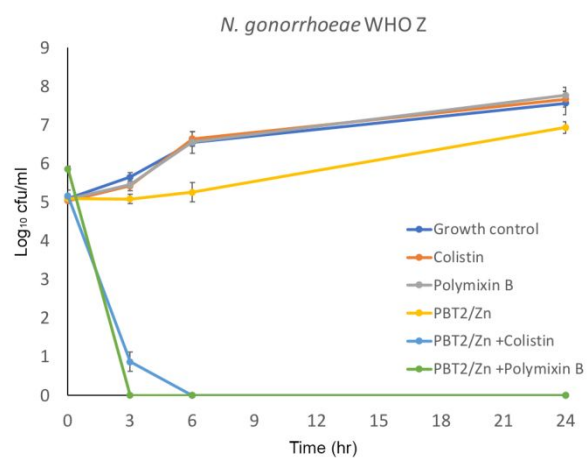

Supplement: Supplementary file 1 [file 18660638]
